# Supplementary material for: Phosphorus-doped amorphous TiO2/C interface enables hierarchical SEI formation on micron-sized SiO anodes for ultra-stable lithium-ion batteries
Source: Royal Society of Chemistry journal article supplement (doi:10.1039/d5ta03139g), 2025-01-01
Supplement: d5ta03139g1.pdf [file d5ta03139g1.pdf]

**Supplementary information:**

**Phosphorus-doped amorphous TiO<sub>2</sub>/C interface enables hierarchical SEI formation on micron-sized SiO anodes for ultra-stable lithium-ion batteries**

Xiuyan Liu, Jinjun Zhou, Guanjia Zhu,\* Jihao Li, Haijiao Zhang\*

Institute of Nanochemistry and Nanobiology, School of Environmental and Chemical Engineering,  
Shanghai University, Shanghai 200444, P. R. China

\*Corresponding author

E-mail: zhuguanjia@shu.edu.cn; hjzhang128@shu.edu.cn

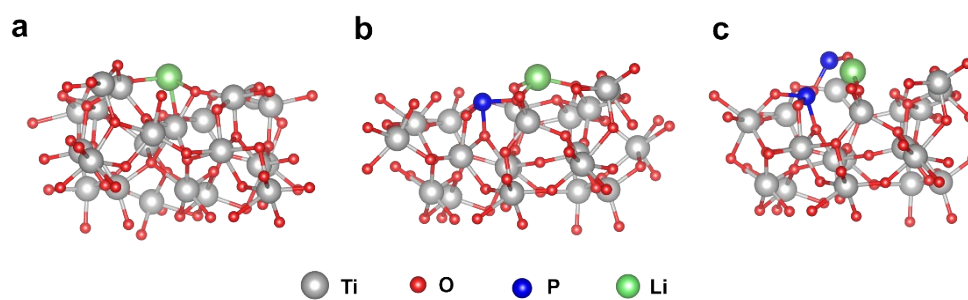

**Fig. S1**  $\text{Li}^+$  adsorption modes of (a) a- $\text{TiO}_2$ , (b) a- $\text{TiO}_2$ -P, (c) a- $\text{TiO}_2$ -2P

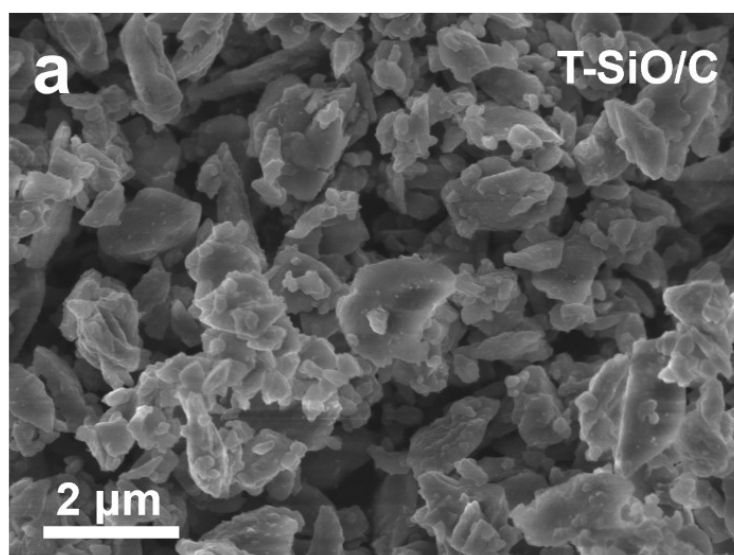

**Fig. S2** SEM image of (a) T-SiO/C.

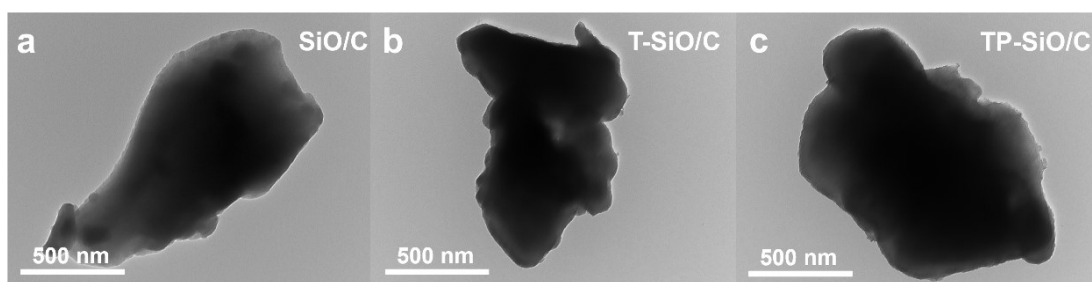

**Fig. S3** TEM images of (a) SiO/C, (b) T-SiO/C, and (c) TP-SiO/C.

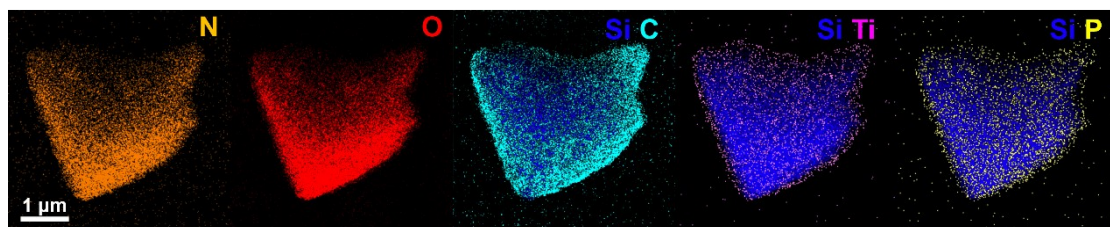

**Fig. S4** EDS mapping images of TP-SiO/C

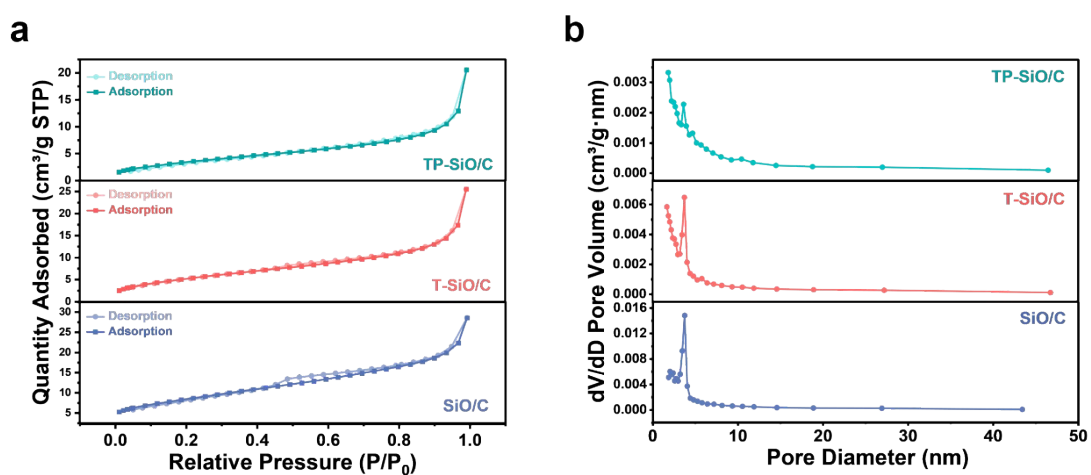

**Fig. S5** (a) Nitrogen adsorption/desorption isotherms TP-SiO/C, T-SiO/C, and SiO/C. (b) Barrett-Joyner-Halenda (BJH) pore size distribution curves of TP-SiO/C, T-SiO/C, and SiO/C.

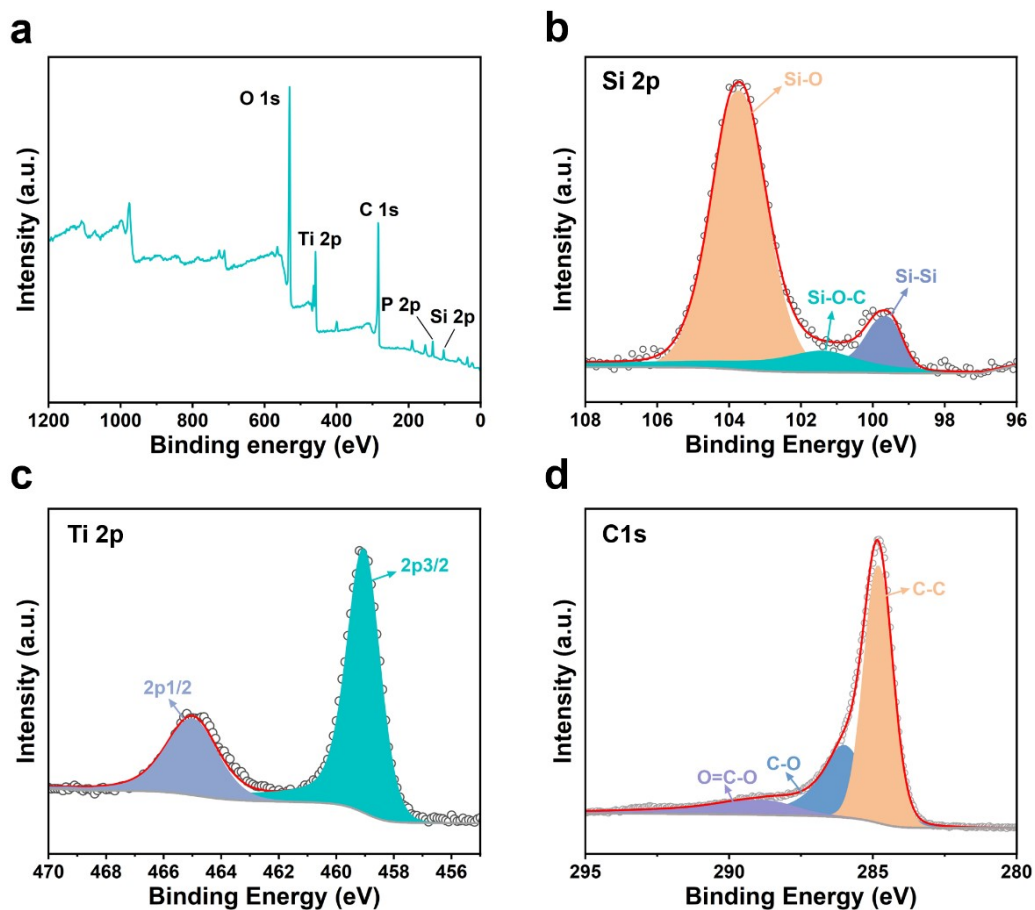

**Fig. S6** (a) XPS survey spectrum of the TP-SiO/C. High-resolution XPS (b) Si 2p, (c) Ti 2p, and (d) C 1s spectra.

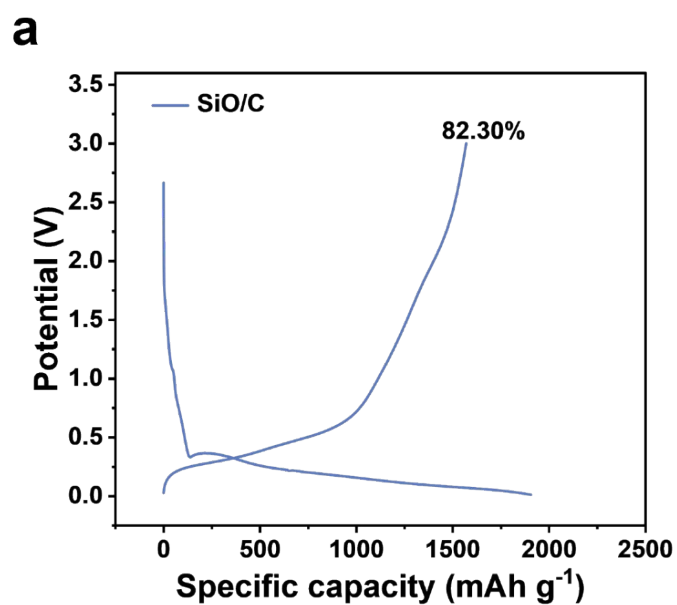

**Fig. S7** The initial discharge/charge curves of SiO/C electrode

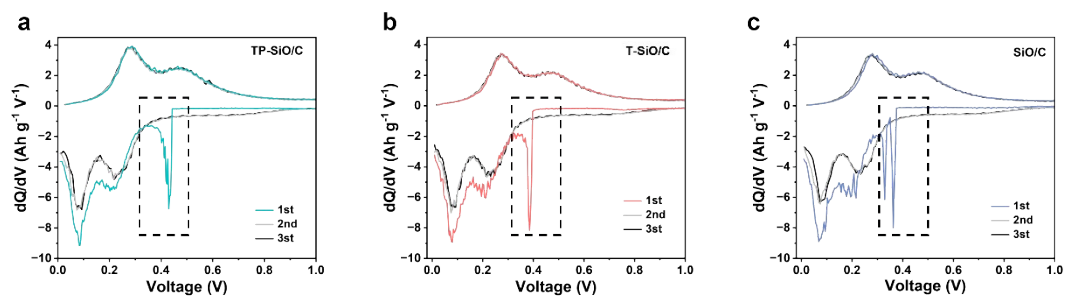

**Fig. S8** dQ/dV curves of (a) TP-SiO/C, (b) T-SiO/C, and (c) SiO/C in the 1st–3rd cycles

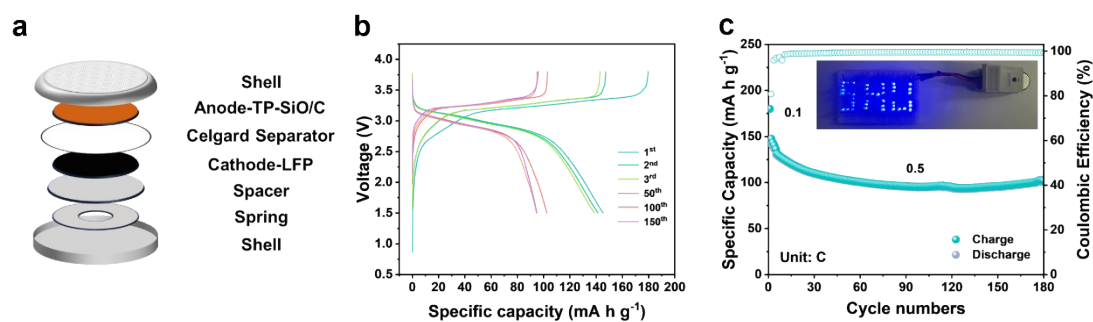

**Fig. S9** (a) Schematic illustration of the TP-SiO/C//LFP full-cell. (b) Galvanostatic charge/discharge profiles and (c) cycling performance of TP-SiO/C//LFP full-cell (inset is the lighting of a digital photo of the LED device with the “LIB” pattern).

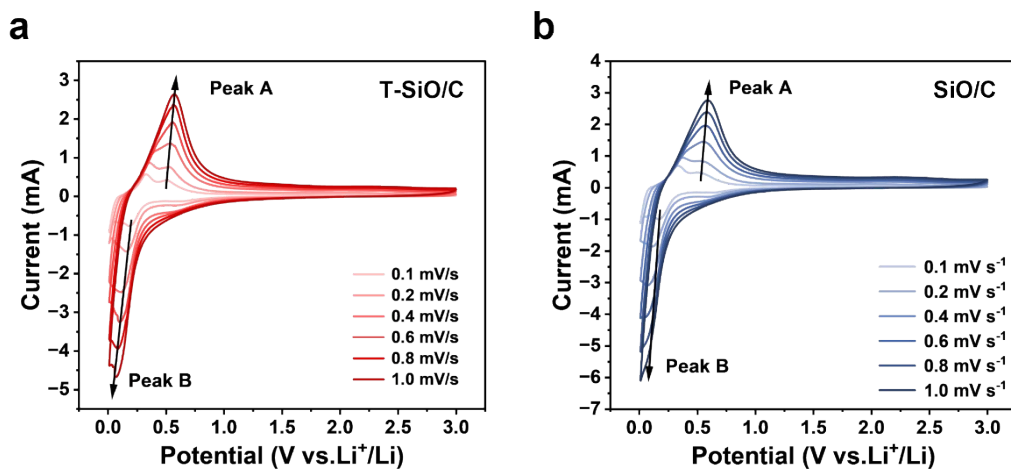

**Fig. S10** CV curves of (a) T-SiO/C, (b) SiO/C at different scan rates of 0.1–1.0 mV s<sup>-1</sup>

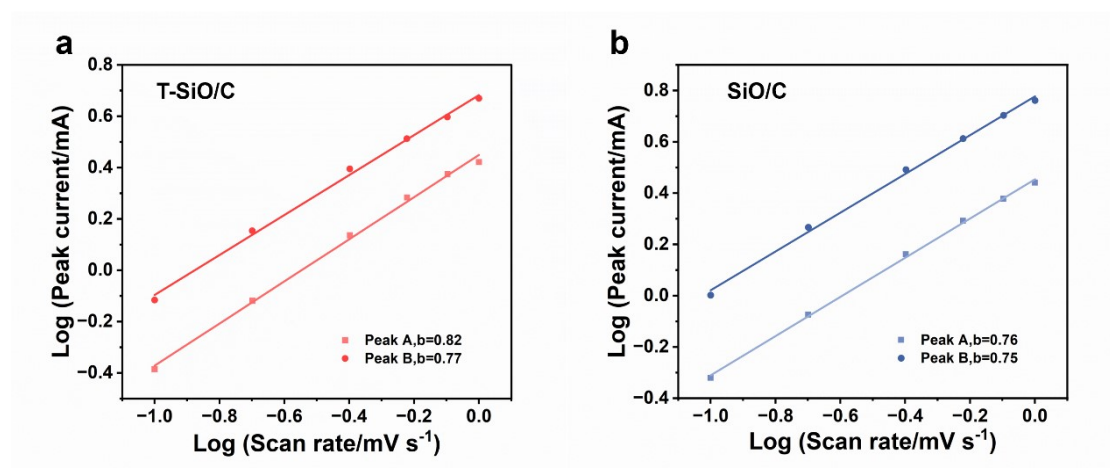

**Fig. S11** Correlation between the logarithm of the peak current and the logarithm of the sweep frequency of (a) T-SiO/C, (b) SiO/C

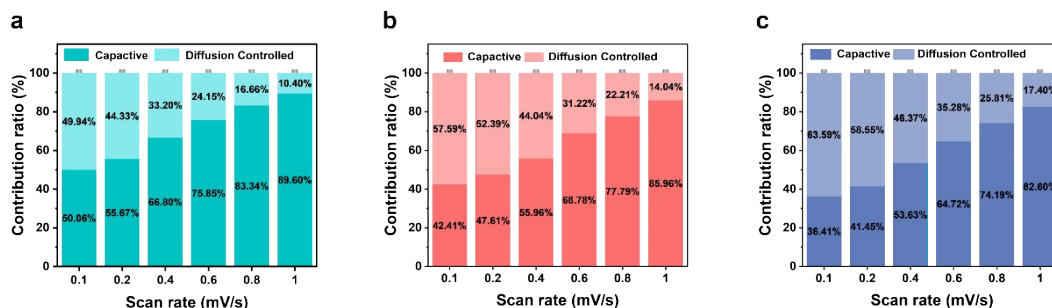

**Fig. S12** Contribution ratio of the pseudo capacitance and diffusion contribution at different scan rates of the (a) TP-SiO/C, (b) T-SiO/C, and (c) SiO/C electrodes.

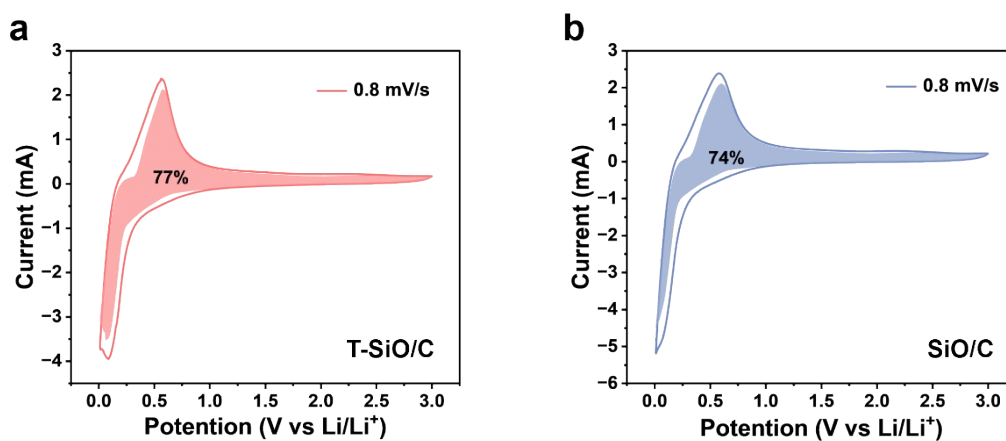

**Fig. S13** Contribution of capacitive charge storage to the total capacity of (a) T-SiO/C and (b) SiO/C electrodes at a scan rate of 0.8 mV s<sup>-1</sup>.

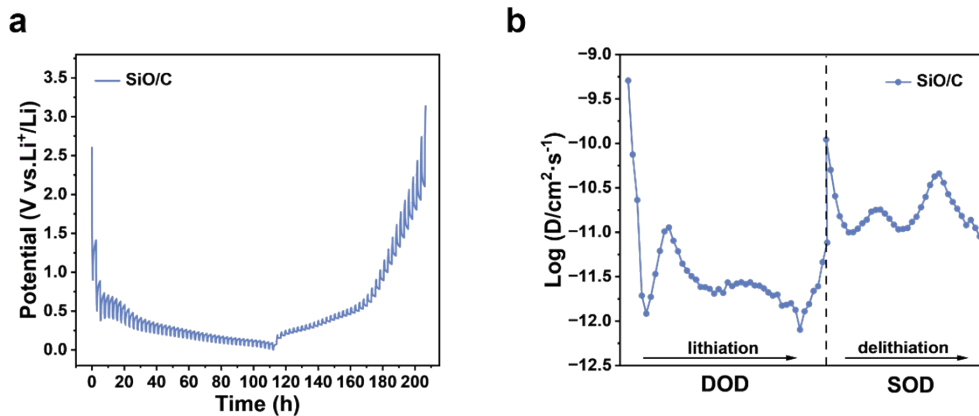

**Fig. S14** (a) GITT curves of SiO/C. (b) Li<sup>+</sup> diffusion rate in different DOD/SOC of SiO/C.

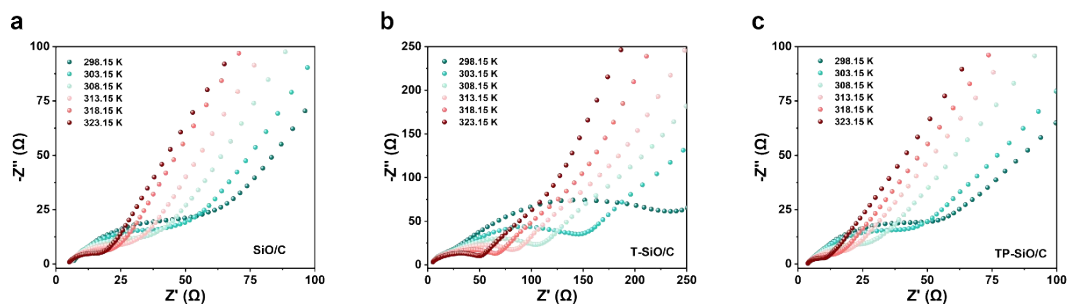

**Fig. S15** The EIS spectra at different temperatures of (a) SiO/C, (b) T-SiO/C, (c) TP-SiO/C

To investigate the Li<sup>+</sup> transport kinetics at the interface, electrochemical impedance spectroscopy (EIS) of the cycled TP-SiO/C, T-SiO/C, and SiO/C electrodes was measured at temperatures ranging from 25°C to 50°C. Before testing, the coin cells were equilibrated at each temperature for 30 minutes to ensure thermal stability. The related activation energies ( $E_a$ ) were obtained by fitting the EIS at different temperatures. Based on the law of Arrhenius:

$$\frac{T}{R} = A \exp\left(-\frac{E_a}{RT}\right)$$

Where T is the temperature, R is the fitted resistance, A is the pre-exponential factor,



$E_a$  is the activation ,  $R$  is  $8.314 \text{ J (mol K)}^{-1}$ .

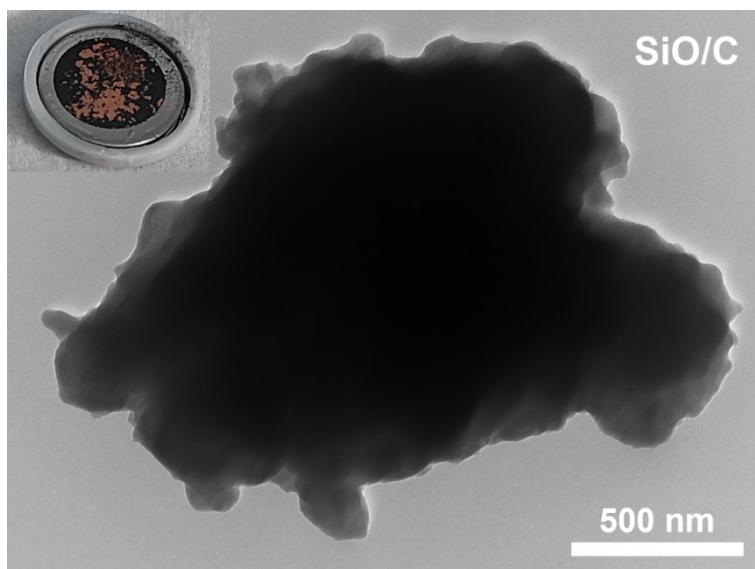

**Fig. S16** Optical photograph and TEM image of SiO/C after cycles

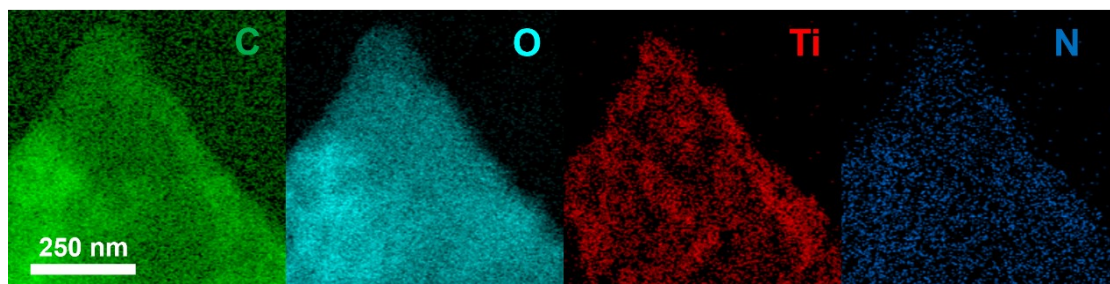

**Fig. S17** EDS mapping images of TP-SiO/C after cycles.

**Table S1.** Comparison of the electrochemical performances of the TP-SiO/C electrode with other SiO-based anodes for lithium-ion batteries.

| Materials | Current Density<br>( $\text{A g}^{-1}$ ) | Cycles | Specific Capacity<br>( $\text{mAh g}^{-1}$ ) | Ref.      |
|-----------|------------------------------------------|--------|----------------------------------------------|-----------|
| TP-SiO/C  | 2                                        | 500    | 730.9                                        | This work |

---

|                                                       |     |     |        |        |
|-------------------------------------------------------|-----|-----|--------|--------|
| p-SiO <sub>x</sub> @0.3TiO <sub>2</sub> @C            | 0.7 | 500 | 588.2  | Ref.31 |
| m-SiO <sub>x</sub> /C/MXene                           | 1   | 400 | 918    | Ref.32 |
| SiO <sub>x</sub> -TiON-200                            | 0.5 | 250 | 854    | Ref.33 |
| SiOG@LiF3                                             | 1.5 | 500 | 706    | Ref.34 |
| SiO <sub>x</sub> @Fe <sub>3</sub> O <sub>4</sub> @FLG | 0.5 | 500 | 833.4  | Ref.13 |
| SiO <sub>x</sub> @CoC                                 | 1   | 350 | 1044   | Ref.35 |
| SiO <sub>x</sub> -Co@C                                | 0.5 | 500 | 653.2  | Ref.36 |
| SiO@C@CoO                                             | 1   | 760 | 714.8  | Ref.12 |
| SSBCN                                                 | 1   | 400 | 1151.3 | Ref.9  |
| (SiO <sub>x</sub> /TiO <sub>2</sub> )@CN              | 1   | 500 | 547    | Ref.37 |
| SiO <sub>x</sub> @TiO <sub>2</sub> @C                 | 1   | 600 | 1197.8 | Ref.11 |

---
